# Supplementary figures and images for: Genotoxic Properties of Polystyrene (PS) Microspheres in the Filter-Feeder Mollusk Mytilus trossulus (Gould, 1850)
Source: MDPI journal article supplement (doi:10.3390/jmse10020273), 2022-02-16

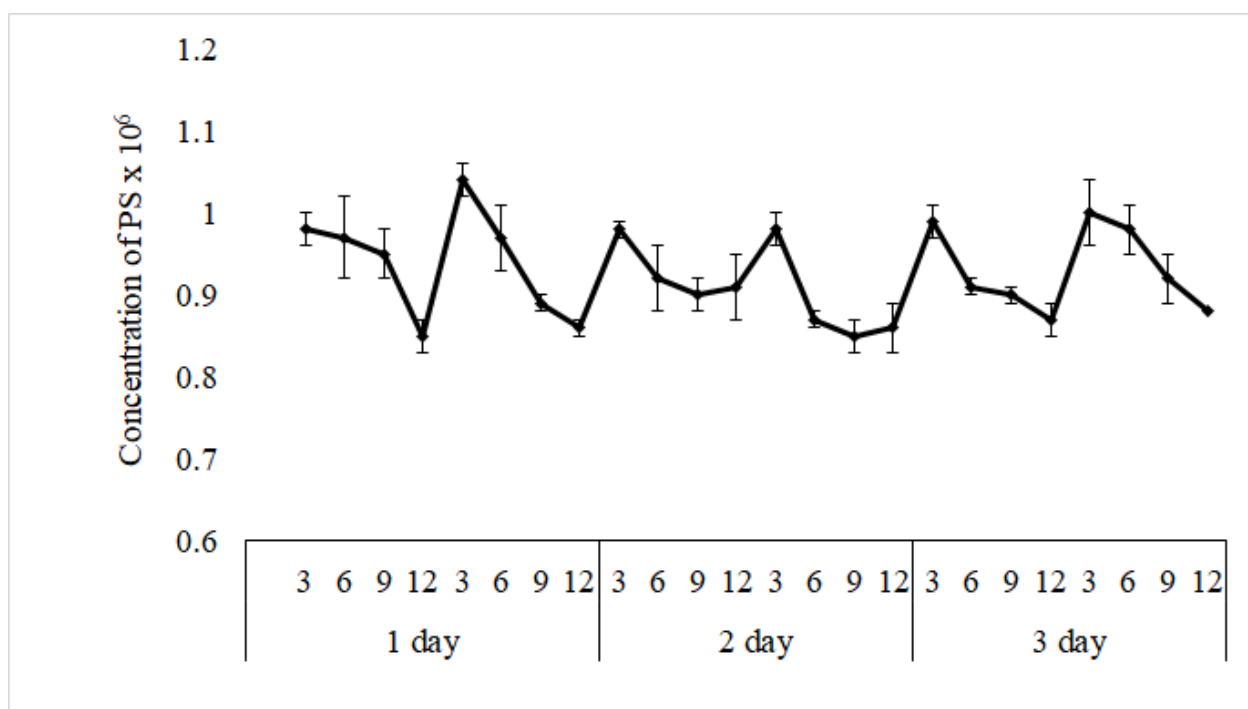

Concentration of PS in the exposure medium (mean  $\pm$  standard deviation, n = 3)

Supplement: s1 [file s1]
